# Supplementary material for: Clinically guided self-refining large language model for automated code stroke activation decision support in the emergency department
Source: Research Square preprint supplement (doi:10.21203/rs.3.rs-8791664/v1), 2026-02-17
Supplement: Supplementary file 1 [file 5c3b6b0991c06c541550f1e9.docx]

**Supplement Table I.** Baseline model inference

| **Model** | **Accuracy** | **Precision** | **Recall** | **F1** |
| --- | --- | --- | --- | --- |
| qLoRA (base) | 0.5890 | 0.7634 | 0.2710 | 0.4000 |
| qLoRA (cRoT) | 0.4355 | 0.4608 | 0.7520 | 0.5714 |

The base model without fine-tuning performed poorly relative to the classic ML models (Table I). Given Stage 1 prompts for all samples the F1 score was low at 0.4000. Given Stage 1 prompts with cRoT for all samples the F1 score improved to 0.5714.
