# Supplementary material for: Clinically guided self-refining large language model for automated code stroke activation decision support in the emergency department
Source: Research Square preprint supplement (doi:10.21203/rs.3.rs-8791664/v1), 2026-02-17
Supplement: Supplementary file 2 [file aae45aff50189e556aa41e3a.docx]

**Stage 1 prompt for validation**

= “You are a neurologist working in the emergency department. Your task is to read the following patient summary and decide if the patient is likely to be diagnosed acute stroke or not. Please respond ONLY with the word ‘yes’ or ‘no’.

Patient summary: *xi*

Label: ”

, or stage 1 prompt for training, was formulated by concatenating the true label, *yi*, at the end of for only the train data folds.

**Stage 2 prompt for validation**

= “You are a neurologist working in the emergency department. Given the patient summary below and the previous prediction, , please reconsider and provide the correct diagnosis (‘yes’ or ‘no’).

Patient summary: *xi*

Previous prediction:

Label: *”*

, or stage 2 prompt for training, was formulated by concatenating the true label, *yi*, at the end of for only the train data folds.
