# Supplementary material for: Clinically guided self-refining large language model for automated code stroke activation decision support in the emergency department
Source: Research Square preprint supplement (doi:10.21203/rs.3.rs-8791664/v1), 2026-02-17
Supplement: Supplementary file 3 [file acf47f2626a1b5cf50d5c570.docx]

**qLoRA configurations**

For Stages 1 and 2 fine tuning, qLoRA was configured with an alpha value of 1, a dropout rate of 0.1, and a rank of 32. The target modules for adaptation included the query (*Q*), key (*K*), value (*V*), and feed-forward multi-layer perceptron components within the attention layers of the base model. Under this configuration, the number of trainable parameters was 83,886,080, corresponding to 1.81% of the total parameters of the quantized LLaMA-3.1-8B-Instruct model. A softmax function was appended at the top to convert logits to probabilities. To compute likelihood ratios between discrete outputs, the model was constrained to produce only ‘yes’ or ‘no’ with maximum token outputs set to 2. This was achieved by masking all other tokens in the final softmax layer and computing the log probabilities of the two allowed tokens. The token with the higher log probability was selected, and log probability differences were used to calculate likelihood ratios.

**Stage 1: Instruction tuning of the baseline model**

The quantized base model was fine-tuned using qLoRA in accordance with the 5 fold cross validation scheme and five distinct random seeds, resulting in a total of 25 trained qLoRA models. Throughout fine tuning, only the up and down projection matrices *A* and *B* were trainable, while all layers of the underlying base model remained frozen. The low-rank matrices were initialized as *B* ~ 0, *A* ~ N(0, σ2), with σ = 0.01. The model was trained by minimizing the **autoregressive negative log-likelihood over successive tokens in each input sequence** . Upon completion of training, the final qLoRA weight update was stored as . Final predictions (pseudo-labels for Stage 2) on the evaluation folds were computed as,

where *Q(W)* is the quantized pretrained weight of the LLM, *p*gen(·) denotes the generation probability for the discrete outputs ‘yes’ or ‘no’, and as stage 1 prompts for the *i*th sample.

**Stage 2: Self-refinement, instruction tuning**

The qLoRA weights in Stage 2 were initialized to . Instruction fine tuning was conducted similarly using refined prompts, to yield predictions as,

where refers to the qLoRA weights after completion of Stage 2 training, stage 1 predictions, and as refined prompts for the *i*th sample.

**Training arguments for fine-tuning**

For both stages of fine tuning, training was conducted with a gradient accumulation step size of 16, using the paged_adamw_32bit optimizer. The learning rate was set to 2e-3 with a weight decay of 0.01. Gradient norms were clipped to a maximum of 0.3, and a warm-up ratio of 0.3 was applied. A cosine learning rate scheduler was employed to adjust the learning rate over training steps. A temperature of 0.1 was set for all experiments to favor deterministic outputs. The number of epochs was set as 2 for Stage 1 and 4 for Stage 2. All computations were performed in half-precision.
