# Supplementary material for: Clinically guided self-refining large language model for automated code stroke activation decision support in the emergency department
Source: Research Square preprint supplement (doi:10.21203/rs.3.rs-8791664/v1), 2026-02-17
Supplement: Supplementary file 4 [file b082832df3b98dca071fbe72.docx]

**Settings**

The system used for Stages 1 and 2 fine tuning operated on an Ubuntu 22.04 LTS (x86_64) environment with an Intel® Core™ i9-10900X CPU running at 3.70 GHz, 93 GiB of RAM, and 2.0 GiB of swap space. Two NVIDIA RTX 3090 graphical processing units (GPUs), each equipped with 24 GiB of GDDR6X VRAM, were used to accelerate model training. The software stack included CUDA [56] Toolkit version 12.8, NVIDIA driver version 570.133.07, and PyTorch [57] 2.7.1+cu126. Distributed data parallel training was conducted using torchrun with the NCCL backend [58]. A distributed data sampler was configured to shard the dataset evenly across both GPUs without overlap. To ensure sufficient VRAM availability, the CUDA cache was cleared, and garbage collection was performed after each fold. Owing to memory constraints, the batch size was set to 1 for training and evaluation, essentially simulating online learning, with evaluation performed per 10 steps during training. Quantization was performed using bitsandbytes. ML implementation and random search was performed using Scikit-Learn [59]. TensorBoard was used to monitor the evaluation loss, mean token accuracies during evaluation, training loss, and mean token accuracies during training throughout all experiments. The system used for English translations and back-front translations operated on another server with similar specifications except for four NVIDIA RTX 3090 GPUs.
