# Supplementary material for: Clinically guided self-refining large language model for automated code stroke activation decision support in the emergency department
Source: Research Square preprint supplement (doi:10.21203/rs.3.rs-8791664/v1), 2026-02-17
Supplement: Supplementary file 5 [file d64c051521a69258eeeadc9c.docx]

**Supplement Table 2.** Best hyperparameters selected via random search.

| **Model** | **Features** | **Tuned hyperparameters** | **Other parameters** |
| --- | --- | --- | --- |
| RF | Unigrams | max_depth=20, min_samples_split=2, n_estimators=250 | criterion="gini", min_samples_leaf=1, max_features="sqrt", bootstrap=True, class_weight=None, random_state = 42 |
| RF | Bigrams | max_depth=20, min_samples_split=2, n_estimators=250 | criterion="gini", min_samples_leaf=1, max_features="sqrt", bootstrap=True, class_weight=None, random_state = 42 |
| SVM | Unigrams | C=10, gamma="scale", kernel="rbf" | degree=3, coef0=0.0, shrinking=True, probability=False, tol=1e-3, class_weight=None, max_iter=-1, random_state = 42 |
| SVM | Bigrams | C=10, gamma="scale", kernel="rbf" | degree=3, coef0=0.0, shrinking=True, probability=False, tol=1e-3, class_weight=None, max_iter=-1, random_state = 42 |
| XGB | Unigrams | colsample_bytree=1.0, learning_rate=0.1, max_depth=7, n_estimators=200, subsample=0.8 | objective="binary:logistic", reg_alpha=0, reg_lambda=1, gamma=0, min_child_weight=1, booster="gbtree", random_state = 42 |
| XGB | Bigrams | colsample_bytree=0.8, learning_rate=0.1, max_depth=7, n_estimators=200, subsample=0.8 | objective="binary:logistic", reg_alpha=0, reg_lambda=1, gamma=0, min_child_weight=1, booster="gbtree", random_state = 42 |
