# Supplementary material for: Clinically guided self-refining large language model for automated code stroke activation decision support in the emergency department
Source: Research Square preprint supplement (doi:10.21203/rs.3.rs-8791664/v1), 2026-02-17
Supplement: Supplementary file 6 [file e0b9723e23060162f3d0c948.docx]

**Section level ablation rules**

To perform section level ablation, clinically motivated concept groups were defined using regular expression (RegEx) patterns. During evaluation, each concept group was removed from the input clinical summary via RegEx substitution to neutral token [removed], and the change in model confidence (Δ log P(ŷ₂)) was measured.

**Concept groups and regex patterns**

**1) Laterality / Focality**

Patterns capturing symptom laterality and focal neurological involvement:

- \bright\b
- \bleft\b
- \bunilateral\b
- \bbilateral\b
- \basymmetri\w*\b
- \bsymmetric\b
- \bhemipare\w*\b
- \bhemipleg\w*\b
- \bmonopare\w*\b
- \bmonopleg\w*\b
- \bfocal\b
- \bfocally\b

**2) Neurological Deficits**

Patterns capturing common neurological deficit terms:

- \bweakness\b
- \bparesis\b
- \bparalysis\b
- \bnumb\w*\b
- \btingl\w*\b
- \bparesthes\w*\b
- \bsensation\b
- \bsensory\b
- \baphasia\b
- \bdysarthria\b
- \bdysphasia\b
- \bfacial\b
- \bfacial\s+droop\b
- \bataxia\b
- \bdysmetria\b
- \bgait\b
- \bimbalance\b
- \bvisual\b
- \bvision\b
- \bhemianopia\b
- \bNIHSS\b

**3) Vascular Risk Factors**

Patterns capturing vascular and cardiovascular risk factors:

- \bhypertension\b
- \bHTN\b
- \bdiabetes\b
- \bDM\b
- \bdyslipidemia\b
- \bHLD\b
- \bhyperlipidemia\b
- \bsmok\w*\b
- \btobacco\b
- \bobesity\b
- \batrial\s*fibrillation\b
- \bAF\b
- \bcoronary\b
- \bCAD\b
- \bvascular\b
- \batherosclero\w*\b

**4) Seizure / Epilepsy**

Patterns capturing seizure or epilepsy-related stroke mimics:

- \bseizure\b
- \bseizures\b
- \bepilep\w*\b
- \bpost[-\s]?ictal\b
- \btodd\w*\s+paralysis\b
- \bconvulsion\b

**5) Cancer**

Patterns capturing malignancy-associated stroke or hypercoagulability:

- \bcancer\b
- \bmalignan\w*\b
- \bmetasta\w*\b
- \bneoplasm\b
- \btumou?r\b
- \boncology\b
- \boncologic\w*\b
- \bchemotherap\w*\b
- \bchemo\b
- \bradiation\b
- \bradiotherap\w*\b
- \bhypercoagul\w*\b
- \bparaneoplastic\b

**6) Anti-Thrombotics**

Patterns capturing antithrombotic exposure:

- \baspirin\b
- \bASA\b
- \bclopidogrel\b
- \bplavix\b
- \bwarfarin\b
- \bcoumadin\b
- \bapixaban\b
- \beliquis\b
- \brivaroxaban\b
- \bxarelto\b
- \bdabigatran\b
- \bpradaxa\b
- \bheparin\b
- \banticoag\w*\b
- \bantiplatelet\b

**7) Temporal Course**

Patterns capturing time course and progression:

- \bacute\b
- \bacutely\b
- \bsudden\b
- \babrupt\b
- \bonset\b
- \bprogressive\b
- \bgradual\b
- \bchronic\b
- \bworsen\w*\b
- \bimprov\w*\b
- \bhistory\s+of\b
